# Supplementary material
Source: publisher site journal article supplement (https://static.cambridge.org/content/id/urn:cambridge.org:id:article:S0376892920000442/resource/name/S0376892920000442supp001.docx)
Supplement: Supplementary file 1 [file S0376892920000442supp001.docx]

**Table S1**. Summary information for the 47 undergraduate conservation degree programmes in the UK

| **University** | **Degree programme** | **School/Department** | **A/AS-level science** | **Placement year** | **Module description availability** |
| --- | --- | --- | --- | --- | --- |
| Aberystwyth University | BSc Wildlife Conservation | Institute of Biological, Environmental and Rural Sciences | Required | Yes | Yes |
| Anglia Ruskin University | BSc Marine Biology with Biodiversity and Conservation | No information | Required | Yes | Yes |
| Bath Spa University | BSc Biology (Conservation Biology) | Culture and Environment | Preferred | Yes | No |
| Bangor University | BSc Environmental Conservation | School of Natural Sciences | Required | Yes | Yes |
| Bangor University | BSc Zoology with Conservation | School of Natural Sciences | Required | No | Yes |
| Bangor University | BSc Forestry with Conservation | School of Natural Sciences | Required | Yes | Yes |
| Bournemouth University | BSc Ecology and Wildlife Conservation | No Information | Not required | Yes | Yes |
| Cornwall College | BSc Applied Zoology and Conservation | No Information | Not required | No | No |
| Edge Hill University | BSc Ecology and Conservation | Department of Biology | Preferred | Yes | Yes |
| Edinburgh Napier University | BSc Animal and Conservation Biology | School of Applied Sciences | Required | Yes | No |
| Harper Adams University | BSc Wildlife Conservation and Environmental management | No Information | Preferred | Yes | Yes |
| Liverpool John Moores University | BSc Wildlife Conservation | School of Natural Sciences and Psychology | Required | Yes | No |
| Newcastle University | BSc Biology (Ecology and Conservation) | School of Natural and Environmental Sciences | Required | Yes | Yes |
| Nottingham Trent University | BSc Wildlife Conservation | No Information | Required | Yes | Yes |
| Nottingham Trent University | BSc Ecology and Conservation | No Information | Not required | Yes | Yes |
| Oxford Brookes University | BSc Animal Biology and Conservation | Department of Biological and Medical Sciences | Preferred | Yes | No |
| Staffordshire University | BSc Ecology and Conservation Practice | School of Sciences | Required | No | No |
| University of Aberdeen | BSc Conservation Biology | School of Biological Sciences | Required | No | Yes |
| University of Brighton | BSc Ecology and Conservation | No Information | Required | Yes | No |
| University of Chester | BSc Wildlife Conservation and Ecology | No Information | Required | No | Yes |
| University of Cumbria | BSc Animal Conservation Science | Science, Natural Resources and Outdoor Studies | Required | Yes | No |
| University of Cumbria | BSc Biological Conservation | Science, Natural Resources and Outdoor Studies | Required | Yes | No |
| University of Cumbria | BSc Marine and Freshwater Conservation | Science, Natural Resources and Outdoor Studies | Required | Yes | No |
| University of Cumbria | BSc Woodland Ecology and Conservation | Science, Natural Resources and Outdoor Studies | Not required | Yes | No |
| University of East Anglia | BSc Ecology and Conservation | Biological Sciences | Required | No | Yes |
| University of Exeter | BSc Conservation Biology and Ecology | BioSciences | Required | Yes | Yes |
| University of Greenwich | BSc Animal Conservation and Biodiversity | No information | Required | No | Yes |
| University of Kent | BSc Wildlife Conservation | School of Anthropology and Conservation | Required | Yes | Yes |
| University of Lancaster | BSc Ecology and Conservation | Lancaster Environment Centre | Required | No | Yes |
| University of Leeds | BSc Ecology and Conservation Biology | Faculty of Biological Sciences | Required | Yes | Yes |
| University of Lincoln | BSc Ecology and Conservation | School of Life Sciences | Required | No | Yes |
| University of London Royal Holloway | BSc Ecology and Conservation | Biological Sciences | Required | No | Yes |
| University of Plymouth | BSc Conservation Biology | School of Biological and Marine Sciences | Required | Yes | Yes |
| University of Plymouth | BSc Ocean Science and Marine Conservation | School of Biological and Marine Sciences | Required | Yes | Yes |
| University of Reading | BSc Ecology and Wildlife Conservation | School of Biological Sciences | Required | Yes | No |
| University of Salford, Manchester | BSc Wildlife Conservation with Zoo Biology | School of Environment and Life Sciences | Not required | Yes | Yes |
| University of Salford, Manchester | BSc Wildlife and Practical Conservation | School of Environment and Life Sciences | Not required | Yes | Yes |
| University of Sheffield | BSc Ecology and Conservation Biology | Department of Animal and Plant Sciences | Required | Yes | No |
| University of Southampton | BSc Ecology and Conservation | Biological Sciences | Required | Yes | Yes |
| University of St Andrews | BSc Ecology and Conservation | Biology | Required | No | Partial |
| University of Stirling | BSc Conservation Biology and Management | Natural Sciences | Required | No | Yes |
| University of Suffolk | BSc Wildlife, Ecology and Conservation Science | Department of Science and Technology | Not required | Yes | Yes |
| University of Sussex | BSc Ecology, Conservation and Environment | School of Life Sciences | Required | Yes | Yes |
| University of Wales Trinity St David | BSc Environmental Conservation | School of Architecture, Built and Natural Environments | Not required | No | No |
| University of Wolverhampton | BSC Animal Behaviour and Wildlife Conservation | Wolverhampton School of Sciences | Required | Yes | No |
| University of the West of England | BSc Wildlife Ecology and Conservation Science | Applied Sciences | Required | Yes | No |
| Writtle University College | BSc Animal Science (Zoo and Wildlife Conservation) | No information | Not required | No | No |
